# Supplementary material for: Effect of Water Quality on the Germination of Okra (Abelmoschus esculentus) Seeds
Source: Hindawi journal article supplement (doi:10.1155/2019/4938349), 2019-10-31
Supplement: f1 [file 4938349.f1.xlsx]

## Sheet: Data_Germ
QUALITY OF WATER ON THE GERMINATIVE FACULTY
Types of water	Ecotypes	Germination rate	Speed of germination
Dam water	L2	0.76	9.21053
Dam water	L2	0.88	8.77273
Dam water	L2	0.88	8.95455
Dam water	L2	0.84	8.66667
Dam water	L2	0.72	8.77778
Dam water	L2	0.88	9.13636
Dam water	L2	0.96	8.95833
Dam water	L2	0.84	8.85714
Dam water	L2	0.92	8.95652
Dam water	L2	0.92	9.13043
Dam water	L2	0.86	8.9421
Dam water	G259	1	9.16
Dam water	G259	0.8	8.85
Dam water	G259	0.84	8.85714
Dam water	G259	0.96	8.79167
Dam water	G259	0.88	9.31818
Dam water	G259	0.92	9.17391
Dam water	G259	0.96	8.95833
Dam water	G259	0.96	8.75
Dam water	G259	0.88	8.81818
Dam water	G259	0.8	9.25
Dam water	G259	0.9	8.99274
Dam water	B2	1	8.8
Dam water	B2	0.92	8.65217
Dam water	B2	0.96	8.08333
Dam water	B2	1	9.08
Dam water	B2	0.96	8.875
Dam water	B2	0.92	9
Dam water	B2	0.96	8.41667
Dam water	B2	0.96	9.125
Dam water	B2	0.96	8.625
Dam water	B2	0.96	8.95833
Dam water	B2	0.96	8.76155
WTP wastewater	L2	0.76	8.10526
WTP wastewater	L2	0.92	8.34783
WTP wastewater	L2	0.76	8.42105
WTP wastewater	L2	0.92	8.69565
WTP wastewater	L2	0.92	8.86957
WTP wastewater	L2	0.84	8.7619
WTP wastewater	L2	0.76	7.57895
WTP wastewater	L2	0.92	8.91304
WTP wastewater	L2	0.72	8.66667
WTP wastewater	L2	0.8	7.55
WTP wastewater	L2	0.832	8.39099
WTP wastewater	G259	0.96	9.08333
WTP wastewater	G259	0.92	8.6087
WTP wastewater	G259	0.8	8.6
WTP wastewater	G259	0.84	8.38095
WTP wastewater	G259	0.96	8.29167
WTP wastewater	G259	0.76	9.05263
WTP wastewater	G259	0.92	8.13043
WTP wastewater	G259	0.88	8.45455
WTP wastewater	G259	0.8	8.6
WTP wastewater	G259	0.76	7.89474
WTP wastewater	G259	0.86	8.5097
WTP wastewater	B2	1	8.04
WTP wastewater	B2	0.96	8.875
WTP wastewater	B2	1	8.04
WTP wastewater	B2	0.96	8.45833
WTP wastewater	B2	0.88	8.18182
WTP wastewater	B2	0.92	8.56522
WTP wastewater	B2	0.92	8.43478
WTP wastewater	B2	0.92	8.26087
WTP wastewater	B2	0.96	8.41667
WTP wastewater	B2	1	8.76
WTP wastewater	B2	0.952	8.40327
Well water	L2	0.8	8.85
Well water	L2	0.84	8.80952
Well water	L2	0.76	8.94737
Well water	L2	0.88	8.90909
Well water	L2	0.72	9.16667
Well water	L2	0.84	9
Well water	L2	0.8	9.15
Well water	L2	0.88	9.09091
Well water	L2	0.8	9.15
Well water	L2	0.88	9.18182
Well water	L2	0.82	9.02554
Well water	G259	0.88	9.18182
Well water	G259	0.84	9.04762
Well water	G259	0.84	8.95238
Well water	G259	0.92	9.04348
Well water	G259	0.88	8.81818
Well water	G259	0.76	8.73684
Well water	G259	0.84	9.19048
Well water	G259	0.8	8.85
Well water	G259	0.92	9.13043
Well water	G259	1	8.88
Well water	G259	0.868	8.98312
Well water	B2	0.92	9.13043
Well water	B2	0.96	8.625
Well water	B2	0.92	8.65217
Well water	B2	0.92	9.04348
Well water	B2	0.96	9.41667
Well water	B2	0.96	8.58333
Well water	B2	0.88	9.09091
Well water	B2	0.96	9.125
Well water	B2	0.96	8.83333
Well water	B2	0.96	8.75
Well water	B2	0.94	8.92503
Dishwashing greywater	L2	0.84	9.19048
Dishwashing greywater	L2	0.88	9.22727
Dishwashing greywater	L2	0.72	8.94444
Dishwashing greywater	L2	0.72	9.11111
Dishwashing greywater	L2	0.84	9.19048
Dishwashing greywater	L2	0.92	9.17391
Dishwashing greywater	L2	0.96	8.66667
Dishwashing greywater	L2	0.92	8.95652
Dishwashing greywater	L2	0.76	8.57895
Dishwashing greywater	L2	0.92	9.13043
Dishwashing greywater	L2	0.848	9.01703
Dishwashing greywater	G259	0.88	8.77273
Dishwashing greywater	G259	0.8	8.65
Dishwashing greywater	G259	0.84	8.90476
Dishwashing greywater	G259	0.72	8.44444
Dishwashing greywater	G259	0.96	9.08333
Dishwashing greywater	G259	0.84	9
Dishwashing greywater	G259	0.8	9.2
Dishwashing greywater	G259	0.88	9
Dishwashing greywater	G259	0.84	8.61905
Dishwashing greywater	G259	0.92	9.3913
Dishwashing greywater	G259	0.848	8.90656
Dishwashing greywater	B2	0.96	8.25
Dishwashing greywater	B2	0.8	8.95
Dishwashing greywater	B2	0.96	9.08333
Dishwashing greywater	B2	0.92	8.65217
Dishwashing greywater	B2	0.88	9.09091
Dishwashing greywater	B2	0.84	8.90476
Dishwashing greywater	B2	0.92	8.78261
Dishwashing greywater	B2	0.96	8.95833
Dishwashing greywater	B2	0.96	8.95833
Dishwashing greywater	B2	0.92	9.17391
Dishwashing greywater	B2	0.912	8.88044
Distilled water	L2	1	9.12
Distilled water	L2	0.92	9.43478
Distilled water	L2	0.88	9.27273
Distilled water	L2	1	9.28
Distilled water	L2	0.72	9.22222
Distilled water	L2	0.96	9.08333
Distilled water	L2	0.76	8.68421
Distilled water	L2	0.92	9.13043
Distilled water	L2	0.88	9.40909
Distilled water	L2	0.8	9.6
Distilled water	L2	0.884	9.22368
Distilled water	G259	0.88	8.68182
Distilled water	G259	0.96	8.75
Distilled water	G259	0.88	9
Distilled water	G259	1	9.04
Distilled water	G259	0.96	9.04167
Distilled water	G259	1	9.16
Distilled water	G259	1	9.16
Distilled water	G259	0.88	8.77273
Distilled water	G259	0.96	9.04167
Distilled water	G259	1	9.2
Distilled water	G259	0.952	8.98479
Distilled water	B2	1	9.12
Distilled water	B2	0.92	9.43478
Distilled water	B2	0.88	9.27273
Distilled water	B2	1	9.28
Distilled water	B2	0.72	9.22222
Distilled water	B2	0.96	9.08333
Distilled water	B2	0.76	8.68421
Distilled water	B2	0.92	9.13043
Distilled water	B2	0.88	9.40909
Distilled water	B2	0.8	9.6
Distilled water	B2	0.884	9.22368

## Sheet: Germination-Parameters
QUALITY OF WATER ON THE GERMINATIVE FACULTY
Types of water	Ecotypes	Germination rate	Speed of germination
Dam water	L2	0.86	8.9421
Dam water	G259	0.9	8.99274
Dam water	B2	0.96	8.76155
WTP wastewater	L2	0.832	8.39099
WTP wastewater	G259	0.86	8.5097
WTP wastewater	B2	0.952	8.40327
Well water	L2	0.82	9.02554
Well water	G259	0.868	8.98312
Well water	B2	0.94	8.92503
Dishwashing greywater	L2	0.848	9.01703
Dishwashing greywater	G259	0.848	8.90656
Dishwashing greywater	B2	0.912	8.88044
Distilled water	L2	0.884	9.22368
Distilled water	G259	0.952	8.98479
Distilled water	B2	0.884	9.22368

## Sheet: ANOVA3_HID
	Modalité	Moyenne estimées	Erreur standard	Borne inférieure (95%)	Borne supérieure (95%)
	Eau Puits	0.876	0.0143886	0.847562	0.904438
	Eau STEP	0.881333	0.0143886	0.852895	0.909772
	Eau Vaisselle	0.869333	0.0143886	0.840895	0.897772
	Eau barrage	0.906667	0.0143886	0.878228	0.935105
	Eau distillée	0.906667	0.0143886	0.878228	0.935105

## Sheet: ANOVA3_HID1
	Modalité	Moyenne estimées	Erreur standard	Borne inférieure (95%)	Borne supérieure (95%)
	Eau Puits	8.9779	0.0506409	8.87781	9.07799
	Eau STEP	8.43465	0.0506409	8.33456	8.53474
	Eau Vaisselle	8.93467	0.0506409	8.83459	9.03476
	Eau barrage	8.8988	0.0506409	8.79871	8.99889
	Eau distillée	9.14405	0.0506409	9.04396	9.24414

## Sheet: ACP1_HID3
	-0.626053	-0.262948	1.73302	1.73302
	-0.1345	0.5155	-1.73302	1.73302
	1.47292	0.81308
	0.490643	-2.26864
	0.598867	-1.48787
	2.36087	-0.328865
	-1.49741	-0.661597
	-0.615252	-0.0197487
	0.692308	0.958694
	-1.02879	-0.241207
	-0.715869	-0.554133
	0.37414	0.387861
	-1.0427	0.915704
	0.713533	1.31847
	-1.0427	0.915704

## Sheet: ACP2_HID
	-0.626053	-0.262948	1.73302	1.73302
	-0.1345	0.5155	-1.73302	1.73302
	1.47292	0.81308
	0.490643	-2.26864
	0.598867	-1.48787
	2.36087	-0.328865
	-1.49741	-0.661597
	-0.615252	-0.0197487
	0.692308	0.958694
	-1.02879	-0.241207
	-0.715869	-0.554133
	0.37414	0.387861
	-1.0427	0.915704
	0.713533	1.31847
	-1.0427	0.915704

## Sheet: Data_Growth
	PARAMETERS OF RADICULAR GROWTH
Types of Water	Ecotypes	Length of the radicle	Growth speed of the radicle
Dam water	L2	5.9	0.983333
Dam water	L2	2.5	0.416667
Dam water	L2	3.5	0.583333
Dam water	L2	5.7	0.95
Dam water	L2	5.7	0.95
Dam water	L2	4.8	0.8
Dam water	L2	3.2	0.533333
Dam water	L2	4	0.666667
Dam water	L2	3.8	0.633333
Dam water	L2	2.5	0.416667
Dam water	L2	4.4	0.733333
Dam water	L2	1.9	0.316667
Dam water	L2	4.5	0.75
Dam water	L2	2.3	0.383333
Dam water	L2	3.2	0.533333
Dam water	L2	1.9	0.316667
Dam water	L2	1.9	0.316667
Dam water	L2	4.4	0.733333
Dam water	L2	3.5	0.583333
Dam water	L2	2.8	0.466667
Dam water	L2	3.62	0.603333
Dam water	G259	1.5	0.25
Dam water	G259	5.2	0.866667
Dam water	G259	2.8	0.466667
Dam water	G259	4.7	0.783333
Dam water	G259	2.1	0.35
Dam water	G259	4.6	0.766667
Dam water	G259	3.4	0.566667
Dam water	G259	3.4	0.566667
Dam water	G259	3.6	0.6
Dam water	G259	3.3	0.55
Dam water	G259	3.8	0.633333
Dam water	G259	3.5	0.583333
Dam water	G259	3	0.5
Dam water	G259	4.4	0.733333
Dam water	G259	3.8	0.633333
Dam water	G259	3.8	0.633333
Dam water	G259	2.5	0.466667
Dam water	G259	2.9	0.483333
Dam water	G259	4.5	0.75
Dam water	G259	4.1	0.683333
Dam water	G259	3.545	0.593333
Dam water	B2	4	0.666667
Dam water	B2	4.9	0.816667
Dam water	B2	4.3	0.716667
Dam water	B2	6	1
Dam water	B2	2.9	0.483333
Dam water	B2	2.7	0.45
Dam water	B2	1.8	0.3
Dam water	B2	3.1	0.516667
Dam water	B2	3.5	0.583333
Dam water	B2	4.8	0.866667
Dam water	B2	1.8	0.3
Dam water	B2	2.8	0.466667
Dam water	B2	3.4	0.666667
Dam water	B2	4.5	0.75
Dam water	B2	2.1	0.35
Dam water	B2	2.7	0.45
Dam water	B2	3.1	0.516667
Dam water	B2	3.4	0.566667
Dam water	B2	5	0.833333
Dam water	B2	2	0.333333
Dam water	B2	3.44	0.581667
WTP wastewater	L2	1.5	0.25
WTP wastewater	L2	3	0.5
WTP wastewater	L2	2.1	0.35
WTP wastewater	L2	1.8	0.3
WTP wastewater	L2	2.5	0.416667
WTP wastewater	L2	2.7	0.45
WTP wastewater	L2	3.2	0.533333
WTP wastewater	L2	3.9	0.65
WTP wastewater	L2	1.6	0.266667
WTP wastewater	L2	2.6	0.433333
WTP wastewater	L2	1.9	0.316667
WTP wastewater	L2	3.5	0.583333
WTP wastewater	L2	1.9	0.316667
WTP wastewater	L2	1.6	0.266667
WTP wastewater	L2	3.4	0.566667
WTP wastewater	L2	4.3	0.716667
WTP wastewater	L2	4.7	0.783333
WTP wastewater	L2	2	0.333333
WTP wastewater	L2	0.8	0.133333
WTP wastewater	L2	2.9	0.483333
WTP wastewater	L2	2.595	0.4325
WTP wastewater	G259	1	0.166667
WTP wastewater	G259	1.1	0.183333
WTP wastewater	G259	3	0.5
WTP wastewater	G259	1.2	0.2
WTP wastewater	G259	4.4	0.733333
WTP wastewater	G259	1.2	0.2
WTP wastewater	G259	1.5	0.25
WTP wastewater	G259	1.5	0.25
WTP wastewater	G259	3.2	0.533333
WTP wastewater	G259	3.1	0.516667
WTP wastewater	G259	3.3	0.55
WTP wastewater	G259	4.4	0.733333
WTP wastewater	G259	2.4	0.4
WTP wastewater	G259	3.2	0.533333
WTP wastewater	G259	2.7	0.45
WTP wastewater	G259	1.9	0.316667
WTP wastewater	G259	3.1	0.516667
WTP wastewater	G259	2.6	0.433333
WTP wastewater	G259	1.6	0.266667
WTP wastewater	G259	1.1	0.183333
WTP wastewater	G259	2.375	0.395833
WTP wastewater	B2	2.9	0.483333
WTP wastewater	B2	4.8	0.8
WTP wastewater	B2	2.5	0.416667
WTP wastewater	B2	3.8	0.633333
WTP wastewater	B2	3.6	0.6
WTP wastewater	B2	3	0.5
WTP wastewater	B2	2.8	0.466667
WTP wastewater	B2	2.1	0.35
WTP wastewater	B2	2.9	0.483333
WTP wastewater	B2	2.7	0.45
WTP wastewater	B2	3	0.5
WTP wastewater	B2	2.9	0.483333
WTP wastewater	B2	2.2	0.366667
WTP wastewater	B2	3.8	0.633333
WTP wastewater	B2	4	0.733333
WTP wastewater	B2	1.8	0.3
WTP wastewater	B2	4.2	0.7
WTP wastewater	B2	3.7	0.616667
WTP wastewater	B2	2.1	0.35
WTP wastewater	B2	2	0.333333
WTP wastewater	B2	3.04	0.51
Well water	L2	4.5	0.75
Well water	L2	1.9	0.316667
Well water	L2	3.9	0.65
Well water	L2	3.5	0.583333
Well water	L2	4.9	0.816667
Well water	L2	3.6	0.6
Well water	L2	3.8	0.633333
Well water	L2	3.2	0.533333
Well water	L2	3.8	0.633333
Well water	L2	3.1	0.516667
Well water	L2	4	0.666667
Well water	L2	5	0.833333
Well water	L2	2.8	0.466667
Well water	L2	2.4	0.4
Well water	L2	3.2	0.533333
Well water	L2	4.1	0.683333
Well water	L2	5.1	0.85
Well water	L2	4.5	0.75
Well water	L2	1.8	0.3
Well water	L2	3.8	0.633333
Well water	L2	3.645	0.6075
Well water	G259	3.1	0.516667
Well water	G259	2.7	0.45
Well water	G259	2.8	0.466667
Well water	G259	3.8	0.633333
Well water	G259	4.1	0.683333
Well water	G259	4.8	0.8
Well water	G259	4	0.666667
Well water	G259	2.2	0.366667
Well water	G259	4.7	0.783333
Well water	G259	2.8	0.466667
Well water	G259	1.3	0.216667
Well water	G259	3.2	0.533333
Well water	G259	4.9	0.816667
Well water	G259	4.5	0.75
Well water	G259	3.4	0.566667
Well water	G259	2.2	0.366667
Well water	G259	2.3	0.383333
Well water	G259	3.2	0.533333
Well water	G259	3	0.5
Well water	G259	3.9	0.65
Well water	G259	3.345	0.5575
Well water	B2	5.6	0.933333
Well water	B2	4.6	0.766667
Well water	B2	3.7	0.616667
Well water	B2	3.5	0.583333
Well water	B2	4.2	0.7
Well water	B2	3	0.5
Well water	B2	2.3	0.383333
Well water	B2	4	0.666667
Well water	B2	4	0.666667
Well water	B2	3.6	0.6
Well water	B2	3.3	0.55
Well water	B2	4.1	0.683333
Well water	B2	2.7	0.45
Well water	B2	2.9	0.483333
Well water	B2	4.7	0.783333
Well water	B2	2.4	0.4
Well water	B2	3.6	0.6
Well water	B2	3.3	0.55
Well water	B2	3.6	0.6
Well water	B2	2.3	0.383333
Well water	B2	3.57	0.595
Dishwashing greywater	L2	2.9	0.483333
Dishwashing greywater	L2	3.7	0.616667
Dishwashing greywater	L2	2.4	0.4
Dishwashing greywater	L2	2.3	0.383333
Dishwashing greywater	L2	3.1	0.516667
Dishwashing greywater	L2	2.9	0.483333
Dishwashing greywater	L2	1.9	0.316667
Dishwashing greywater	L2	2.6	0.433333
Dishwashing greywater	L2	3.1	0.516667
Dishwashing greywater	L2	3.6	0.6
Dishwashing greywater	L2	3.3	0.55
Dishwashing greywater	L2	3.1	0.516667
Dishwashing greywater	L2	1.2	0.2
Dishwashing greywater	L2	2.1	0.35
Dishwashing greywater	L2	4.3	0.716667
Dishwashing greywater	L2	3	0.5
Dishwashing greywater	L2	3	0.5
Dishwashing greywater	L2	3	0.5
Dishwashing greywater	L2	2.8	0.466667
Dishwashing greywater	L2	4.3	0.716667
Dishwashing greywater	L2	2.93	0.488333
Dishwashing greywater	G259	2.4	0.4
Dishwashing greywater	G259	3	0.5
Dishwashing greywater	G259	2.3	0.383333
Dishwashing greywater	G259	3.1	0.516667
Dishwashing greywater	G259	4.2	0.7
Dishwashing greywater	G259	2.3	0.383333
Dishwashing greywater	G259	4.1	0.683333
Dishwashing greywater	G259	1.9	0.316667
Dishwashing greywater	G259	2.6	0.433333
Dishwashing greywater	G259	2	0.333333
Dishwashing greywater	G259	4.3	0.716667
Dishwashing greywater	G259	2.8	0.466667
Dishwashing greywater	G259	2.9	0.483333
Dishwashing greywater	G259	2.4	0.4
Dishwashing greywater	G259	2.3	0.383333
Dishwashing greywater	G259	3	0.5
Dishwashing greywater	G259	5.7	0.95
Dishwashing greywater	G259	2.9	0.483333
Dishwashing greywater	G259	2	0.333333
Dishwashing greywater	G259	2.2	0.366667
Dishwashing greywater	G259	2.92	0.486667
Dishwashing greywater	B2	4.5	0.75
Dishwashing greywater	B2	2.6	0.433333
Dishwashing greywater	B2	2.2	0.366667
Dishwashing greywater	B2	2	0.333333
Dishwashing greywater	B2	2.1	0.35
Dishwashing greywater	B2	3.3	0.55
Dishwashing greywater	B2	2	0.333333
Dishwashing greywater	B2	2.3	0.383333
Dishwashing greywater	B2	1.5	0.25
Dishwashing greywater	B2	2.5	0.416667
Dishwashing greywater	B2	2.6	0.433333
Dishwashing greywater	B2	3.7	0.616667
Dishwashing greywater	B2	2.7	0.45
Dishwashing greywater	B2	1.9	0.316667
Dishwashing greywater	B2	2.5	0.416667
Dishwashing greywater	B2	4	0.666667
Dishwashing greywater	B2	5.1	0.85
Dishwashing greywater	B2	3.2	0.533333
Dishwashing greywater	B2	2.8	0.466667
Dishwashing greywater	B2	2.2	0.366667
Dishwashing greywater	B2	2.785	0.464167
Distilled water	L2	2.5	0.416667
Distilled water	L2	3	0.5
Distilled water	L2	3.5	0.583333
Distilled water	L2	2.5	0.416667
Distilled water	L2	1.8	0.3
Distilled water	L2	2.8	0.466667
Distilled water	L2	2.7	0.45
Distilled water	L2	3.2	0.533333
Distilled water	L2	3.2	0.533333
Distilled water	L2	2	0.333333
Distilled water	L2	3.8	0.633333
Distilled water	L2	2.4	0.4
Distilled water	L2	2.8	0.466667
Distilled water	L2	3.3	0.55
Distilled water	L2	2.7	0.45
Distilled water	L2	2.9	0.483333
Distilled water	L2	1.7	0.283333
Distilled water	L2	3.1	0.516667
Distilled water	L2	1.5	0.25
Distilled water	L2	2.7	0.45
Distilled water	L2	2.705	0.450833
Distilled water	G259	4	0.666667
Distilled water	G259	1.1	0.183333
Distilled water	G259	2.9	0.483333
Distilled water	G259	3.7	0.616667
Distilled water	G259	2.4	0.4
Distilled water	G259	5	0.833333
Distilled water	G259	5.1	0.85
Distilled water	G259	3.7	0.616667
Distilled water	G259	2	0.333333
Distilled water	G259	4.5	0.75
Distilled water	G259	4.9	0.816667
Distilled water	G259	3.3	0.55
Distilled water	G259	4.5	0.75
Distilled water	G259	2.1	0.35
Distilled water	G259	1.7	0.283333
Distilled water	G259	1.6	0.266667
Distilled water	G259	3.4	0.566667
Distilled water	G259	2	0.333333
Distilled water	G259	2.4	0.4
Distilled water	G259	2.5	0.416667
Distilled water	G259	3.14	0.523333
Distilled water	B2	2.6	0.433333
Distilled water	B2	3	0.5
Distilled water	B2	4.2	0.7
Distilled water	B2	4.9	0.816667
Distilled water	B2	3.4	0.566667
Distilled water	B2	4.9	0.816667
Distilled water	B2	3.8	0.633333
Distilled water	B2	2.4	0.4
Distilled water	B2	3.5	0.583333
Distilled water	B2	3	0.5
Distilled water	B2	4.4	0.733333
Distilled water	B2	3.2	0.533333
Distilled water	B2	2.7	0.45
Distilled water	B2	4.2	0.7
Distilled water	B2	4	0.666667
Distilled water	B2	2.1	0.35
Distilled water	B2	4.6	0.766667
Distilled water	B2	2.6	0.433333
Distilled water	B2	2.2	0.366667
Distilled water	B2	3.3	0.55
Distilled water	B2	3.45	0.575

## Sheet: Growth-Parameters
	PARAMETERS OF RADICULAR GROWTH
Types of Water	Ecotypes	Length of the radicle	Growth speed of the radicle
Dam water	L2	3.62	0.603333
Dam water	G259	3.545	0.593333
Dam water	B2	3.44	0.581667
WTP wastewater	L2	2.595	0.4325
WTP wastewater	G259	2.375	0.395833
WTP wastewater	B2	3.04	0.51
Well water	L2	3.645	0.6075
Well water	G259	3.345	0.5575
Well water	B2	3.57	0.595
Dishwashing greywater	L2	2.93	0.488333
Dishwashing greywater	G259	2.92	0.486667
Dishwashing greywater	B2	2.785	0.464167
Distilled water	L2	2.705	0.450833
Distilled water	G259	3.14	0.523333
Distilled water	B2	3.45	0.575

## Sheet: ACP_HID1
	2.62239	0.256064	-0.0748702	-0.0230689	2.61691	-2.61726	-0.447178	-3.65496
	2.57647	0.545277	-0.0137828	-0.000575978	2.63174	-2.53339	-0.209908	3.72409
	2.1161	0.51119	0.0742752	0.0613652	2.66494	2.21584	3.90139	-0.15599
	-1.32593	1.43772	-0.00708398	-0.0151911	2.52603	3.01313	-3.43397	0.0710907
	-3.33118	0.556498	-0.342374	0.0129752
	-0.0171833	0.443201	0.106461	0.0184318
	1.75087	-0.760939	-0.0599294	-0.0106169
	1.49578	0.519237	-0.17168	-0.0165103
	1.50442	-0.635986	-0.0177669	-0.0117596
	-1.03655	0.0102937	0.137292	-0.00927309
	-1.18148	-0.0697189	0.0061246	-0.00370295
	-2.2282	-0.456237	0.0582558	0.00316656
	-1.64826	0.506996	0.327905	-0.0164045
	-1.43935	-1.43938	-0.0873415	0.0120511
	0.142094	-1.42421	0.0645147	-0.000886714

## Sheet: ANOVA_HID
	Modalité	Moyenne estimées	Erreur standard	Borne inférieure (95%)	Borne supérieure (95%)
	B2	3.257	0.10367	3.05298	3.46102
	G259	3.065	0.10367	2.86098	3.26902
	L2	3.099	0.10367	2.89498	3.30302

[truncated: 14 more sheets: ANOVA_HID1, ANOVA_HID2, ANOVA_HID3, ANOVA1_HID, ANOVA1_HID1, ANOVA1_HID2, ANOVA1_HID3, ACP_HID, ACP1_HID, ANOVA2_HID, ANOVA2_HID1, ACP1_HID1, ACP1_HID2, ACP_HID2]
